# Supplementary material for: Correlation between Performance-Based and Interview-Based Cognitive Measurements in Patients with Schizophrenia
Source: PubMed Central journal article supplement — Psychiatry Investig. 2020 Jul 8;17(7):695–701. doi: 10.30773/pi.2020.0085 (PMC7385218; doi:10.30773/pi.2020.0085), 2020-07-08
Supplement: pi-2020-0085-suppl3.pdf [file pi-2020-0085-suppl3.pdf]

**Supplementary Table 3.** Items of SCoRS

---

Do you/does the patient have difficulty...

---

1. Remembering names of people you know or meet?
  2. Remembering how to get places?
  3. Following a TV show?
  4. Remembering where you put things?
  5. Remembering your chores and responsibilities?
  6. Learning how to use new gadgets and equipment?
  7. Remembering information and/or instructions recently given to you?
  8. Remembering what you were going to say?
  9. Keeping track of your money?
  10. Keeping your words from being jumbled together?
  11. Concentrating well enough to read a newspaper or a book?
  12. With familiar tasks?
  13. Staying focused?
  14. Learning new things?
  15. Speaking as fast as you would like?
  16. Doing things quickly?
  17. Handling changes in your daily routine?
  18. Understanding what people mean when they are talking to you?
  19. Understanding how other people feel about things?
  20. Following conversations in a group?
- 

SCoRS: Schizophrenia Cognition Rating Scale
